# Supplementary material for: Investigation of ZnCo2O4–Pt hybrids with different morphologies towards catalytic CO oxidation
Source: Royal Society of Chemistry journal article supplement (doi:10.1039/c5dt03360h), 2015-01-01
Supplement: c5dt03360h1.pdf [file c5dt03360h1.pdf]

## Supporting Information

### Investigation of ZnCo<sub>2</sub>O<sub>4</sub>-Pt hybrids with different morphologies towards catalytic CO oxidation

Fan Wang,<sup>[a,b]</sup> Xiao Wang,<sup>[a]</sup> Dapeng Liu,<sup>[c]\*</sup> Jiangman Zhen,<sup>[a]</sup> Junqi Li,<sup>[a,b]</sup>  
Hongjie Zhang<sup>[a]\*</sup>

<sup>a</sup>State Key Laboratory of Rare Earth Resource Utilization, Changchun Institute of Applied Chemistry, Chinese Academy of Sciences, Changchun, 130022 Jilin, China.

<sup>b</sup>Graduate University of Chinese Academy of Sciences, Beijing 100039, P.R. China

<sup>c</sup>Key Laboratory of Bio-Inspired Smart Interfacial Science and Technology of Ministry of Education, School of Chemistry and Environment, Beihang University, Beijing 100191, China.

E-mail: liudp@buaa.edu.cn; hongjie@ciac.ac.cn

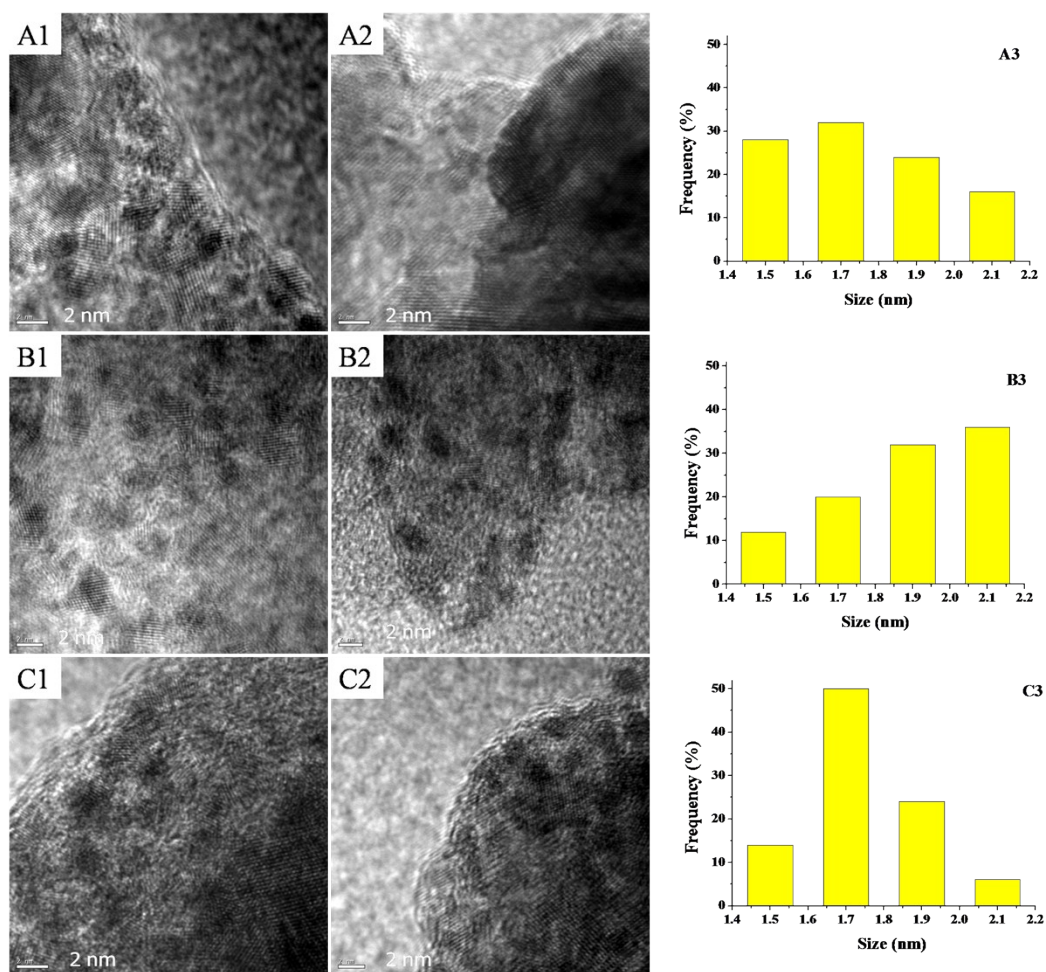

**FigureS1.** TEM images of A: ZnCo<sub>2</sub>O<sub>4</sub>-Pt rods and size distribution of Pt NPs, B: ZnCo<sub>2</sub>O<sub>4</sub>-Pt plates and size distribution of Pt NPs, C: ZnCo<sub>2</sub>O<sub>4</sub>-Pt spheres and size distribution of Pt NPs.

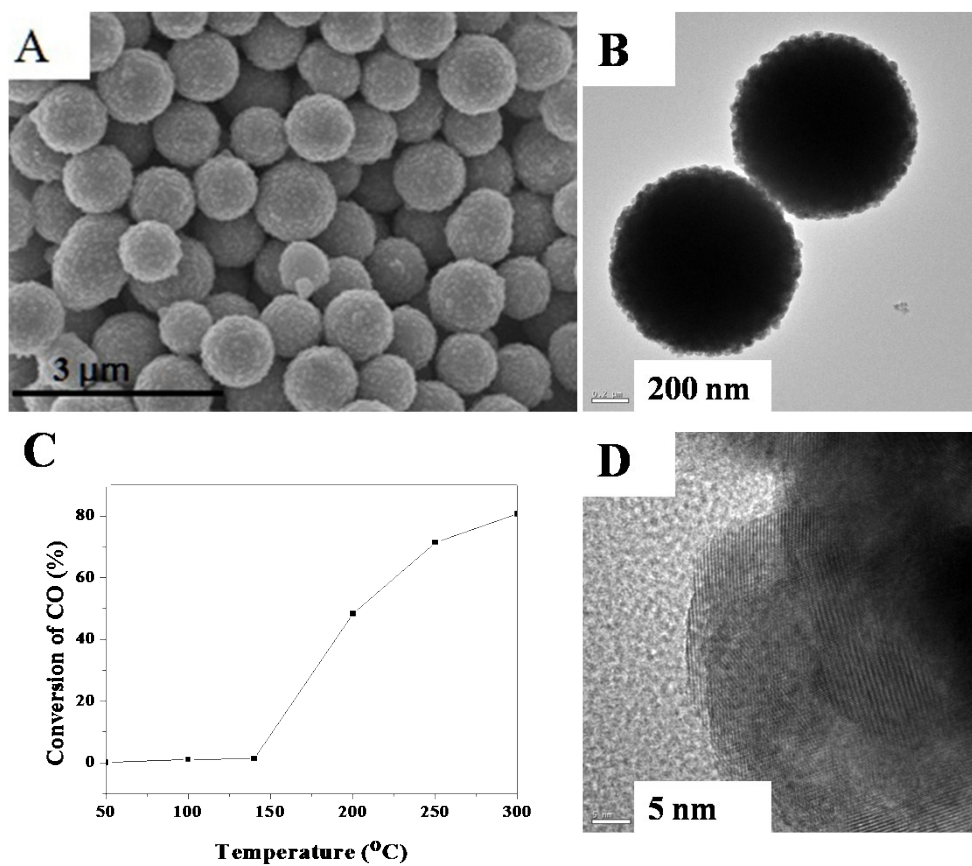

**Figure S2.** (A): SEM images of ZnCo<sub>2</sub>O<sub>4</sub>-Pt spheres without PVP; (B) and (D): TEM images of ZnCo<sub>2</sub>O<sub>4</sub>-Pt spheres without PVP; (C): CO conversion curves of ZnCo<sub>2</sub>O<sub>4</sub>-Pt spheres without PVP.

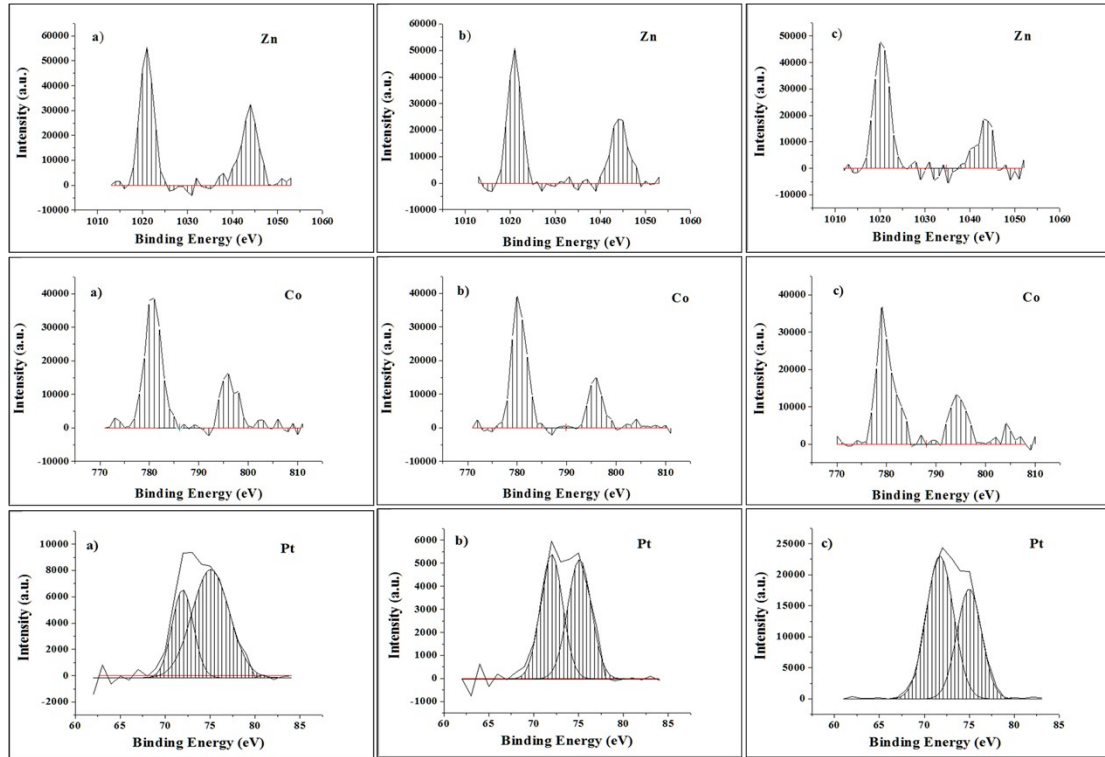

**FigureS3.** Normalized XPS spectra (a): ZnCo<sub>2</sub>O<sub>4</sub>-Pt rods, (b): ZnCo<sub>2</sub>O<sub>4</sub>-Pt plates, (C): ZnCo<sub>2</sub>O<sub>4</sub>-Pt spheres.

| Sample                                      | Pt (ev.s) | Zn (ev.s) | Co (ev.s) | Zn:Co:Pt           |
|---------------------------------------------|-----------|-----------|-----------|--------------------|
| ZnCo <sub>2</sub> O <sub>4</sub> -Pt rod    | 62664     | 347777    | 244761    | 1.42 : 1.00 : 0.26 |
| ZnCo <sub>2</sub> O <sub>4</sub> -Pt plate  | 33724     | 287218    | 200559    | 1.43 : 1.00 : 0.17 |
| ZnCo <sub>2</sub> O <sub>4</sub> -Pt sphere | 148706    | 259436    | 221544    | 1.17 : 1.00 : 0.67 |

**Table S1.** The integrals of the peaks of the three samples.

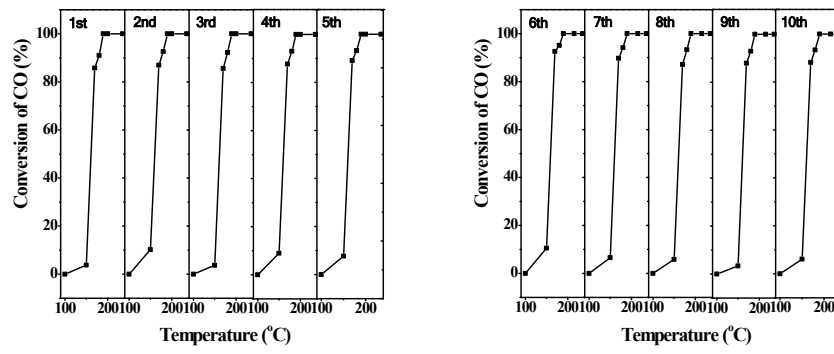

**Figure S4.** Cycling test of ZnCo<sub>2</sub>O<sub>4</sub>-Pt rod for CO conversion.

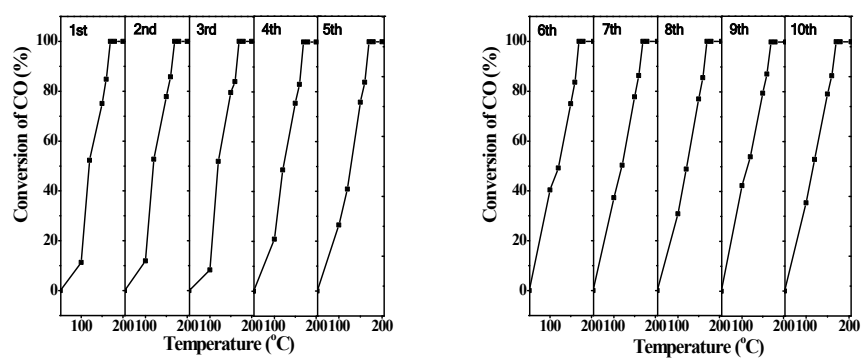

**Figure S5.** Cycling test of ZnCo<sub>2</sub>O<sub>4</sub>-Pt plate for CO conversion.
